# Supplementary material for: A one-pot approach to prepare stretchable and conductive regenerated silk fibroin/CNT films as multifunctional sensors
Source: Royal Society of Chemistry journal article supplement (doi:10.1039/d3nr01347b), 2023-01-01
Supplement: d3nr01347b1.pdf [file d3nr01347b1.pdf]

**One-pot Approach to Prepare Stretchable and Conductive Regenerated Silk  
Fibroin/CNT Films as Multifunctional Sensors**

*Qiujie Meng<sup>a,b</sup>, Lunyu Zhao<sup>a,b</sup>, Yu Geng<sup>a,b</sup>, Pengxiang Yin<sup>a,b</sup>, Zhiping Mao<sup>b,c</sup>, Xiaofeng Sui<sup>a</sup>, Meixin Zhao<sup>d</sup>, Edmondo M. Benetti<sup>e</sup>, Xueling Feng<sup>a,b,c,\*</sup>*

*<sup>a</sup> Key Lab of Science and Technology of Eco-textile, Ministry of Education, College of Chemistry and Chemical Engineering, Donghua University, Shanghai 201620, China*

*<sup>b</sup> Shanghai Frontier Science Research Center for Modern Textiles, Donghua University, Shanghai 201620, China*

*<sup>c</sup> National Manufacturing Innovation Center of Advanced Dyeing and Finishing Technology, Tai'an, Shandong 271000, China*

*<sup>d</sup> Department of Nuclear Medicine, Peking University Third Hospital, 49 North Garden Road, Haidian District, Beijing 100191, China*

*<sup>e</sup> Department of Chemical Sciences, University of Padova, Via Marzolo 1, 35131, Padova, Italy*

*\*Corresponding author:*

*E-mail: xlfeng@dhu.edu.cn (Xueling Feng)*

*Address: No. 2999 North Renmin Road, Shanghai 201620, People's Republic of China.*

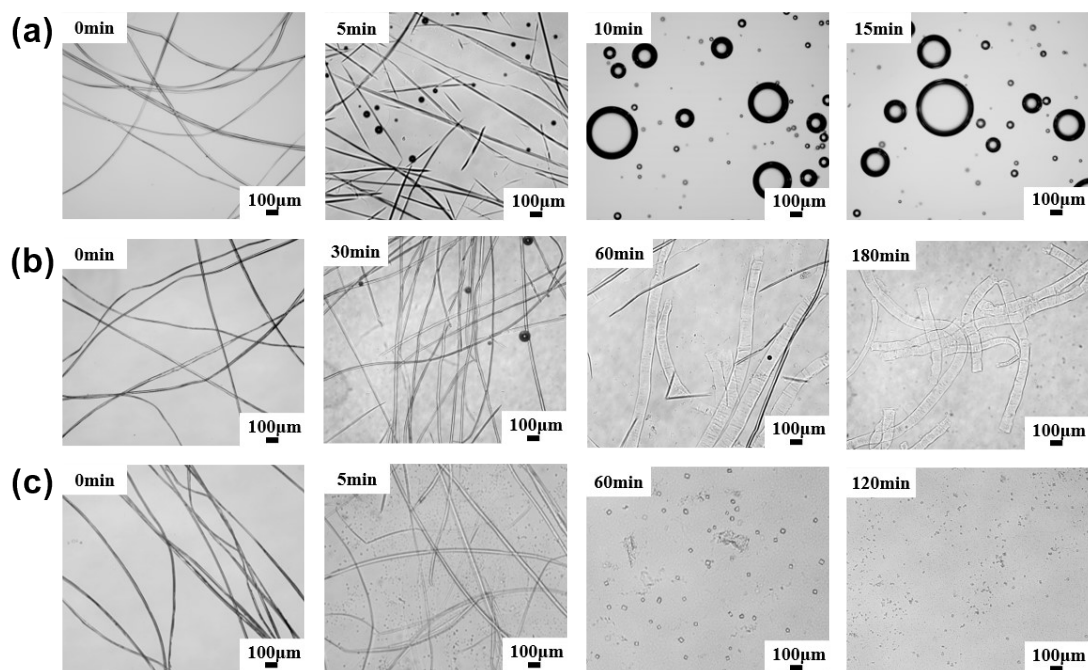

**Figure S1.** The dissolution process of silk fibroin. (a) aq. PA (85 wt%), 25°C. (b) aq. LiBr, 60°C. (c) aq.  $\text{CaCl}_2/\text{CH}_3\text{CH}_2\text{OH}/\text{H}_2\text{O}$ , 80°C.

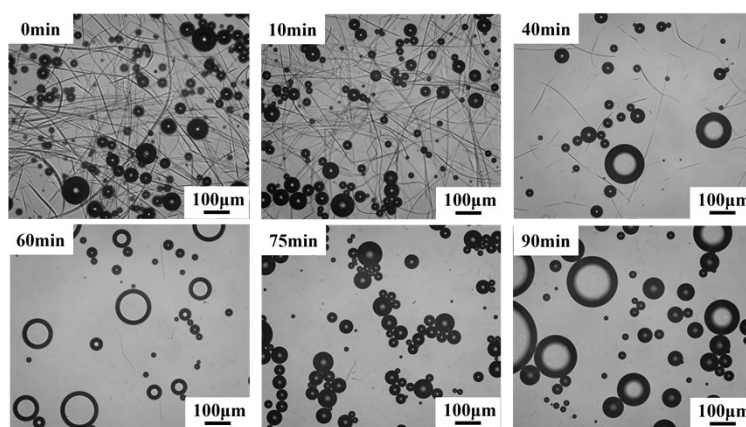

**Figure S2.** The dissolution process of silk fibroin in 75 wt%  $\text{H}_3\text{PO}_4$ , at 25°C.

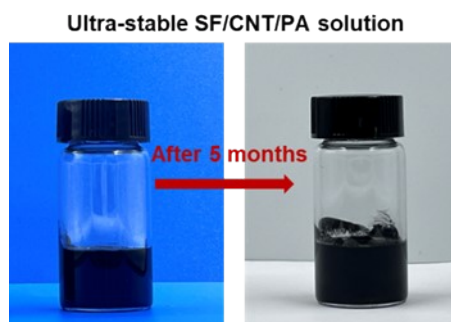

**Figure S3.** Optical micrographs of a  $\text{H}_3\text{PO}_4/\text{CNT}/\text{SF}$  solution after 5 months since the preparation.

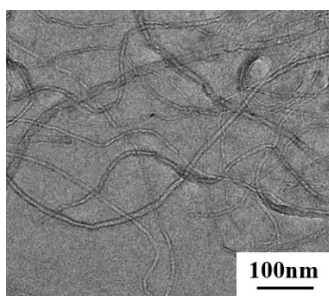

**Figure S4.** TEM image for SF/CNT showing the CNTs modified by SF was homogeneously dispersed.

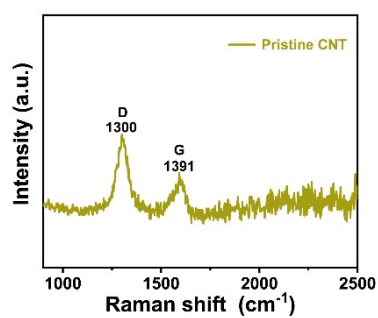

**Figure S5.** Raman spectrum of pristine CNT.

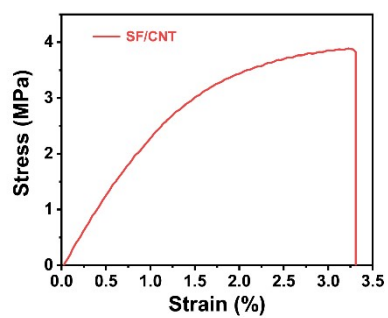

**Figure S6.** The tensile stress-strain curves of the neat SF/CNT-1.

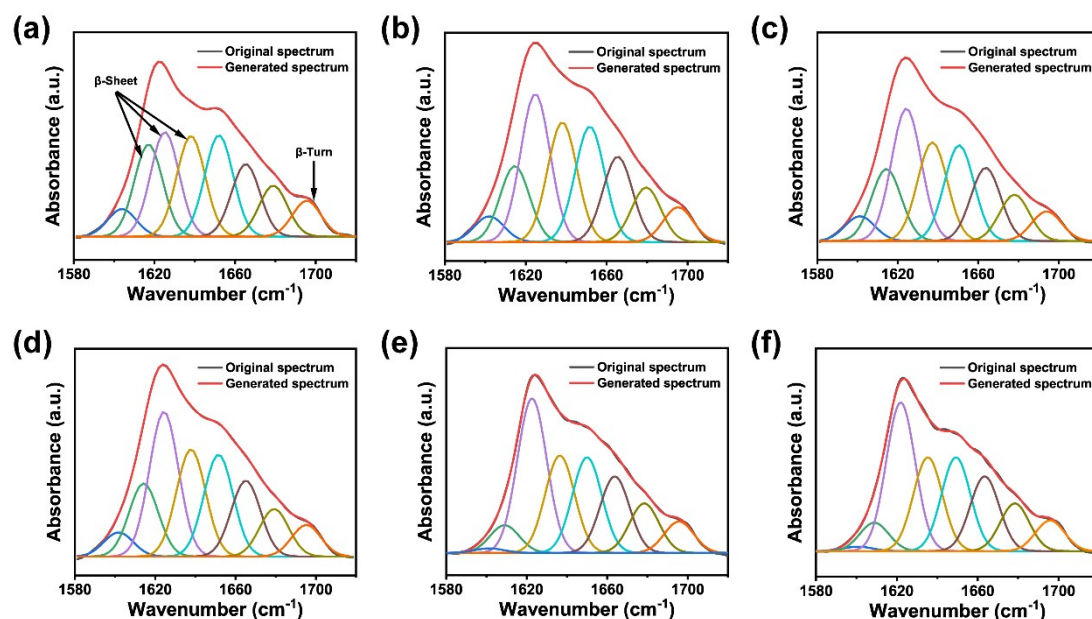

**Figure S7.** FTIR spectra of SF/GL films and SF/GL/CNT films. (a) Deconvolution of amide I band in FTIR spectra of SF/GL films. (b) Deconvolution of amide I band in FTIR spectra of SF/GL/CNT-1 films. (c) Deconvolution of amide I band in FTIR spectra of SF/GL/CNT-3 films. (d) Deconvolution of amide I band in FTIR spectra of SF/GL/CNT-5 films. (e) Deconvolution of amide I band in FTIR spectra of SF/GL/CNT-7 films. (f) Deconvolution of amide I band in FTIR spectra of SF/GL/CNT-9 films.

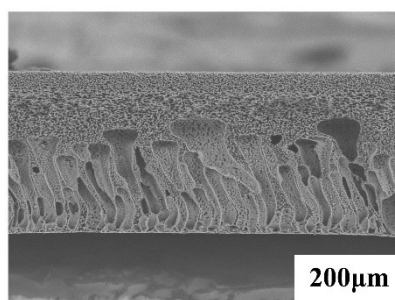

**Figure S8.** The SEM images of SF/GL films.

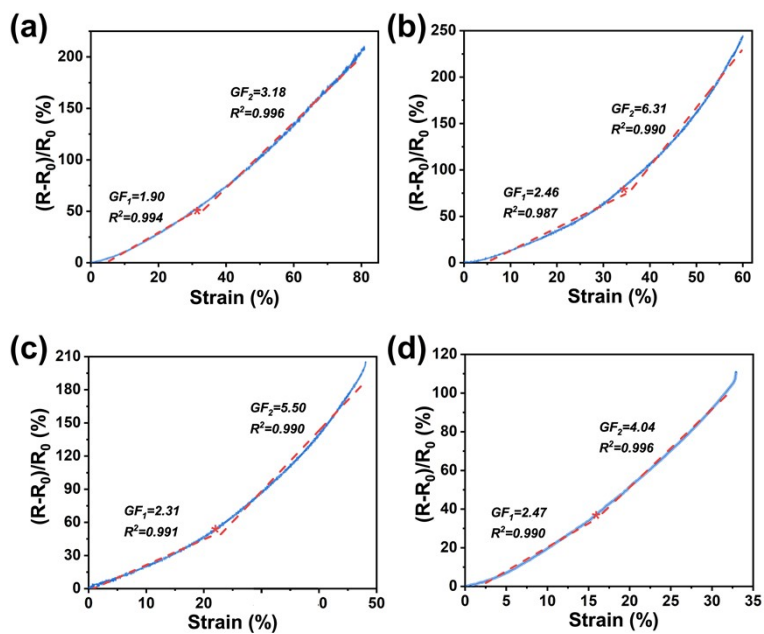

**Figure S9.** Typical relative resistance versus strain curve of SF/GL/CNT films with varying CNT content at a stretching rate of 10 mm min<sup>-1</sup>. (a) SF/GL/CNT-1. (b) SF/GL/CNT-5. (c) SF/GL/CNT-7. (d) SF/GL/CNT-9.

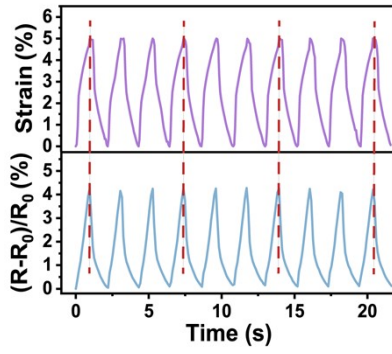

**Figure S10.** Dynamic response of the sensor to ten loading and unloading cycles at 5 % strain, indicating the negligible signal hysteresis.

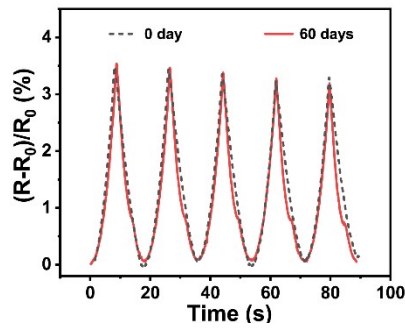

**Figure S11.** The relative resistance change vs time during the loading-unloading cycles at a strain of 3% for the initial SF/GL/CNT-3 sensor and the sensor after placing 60 days.

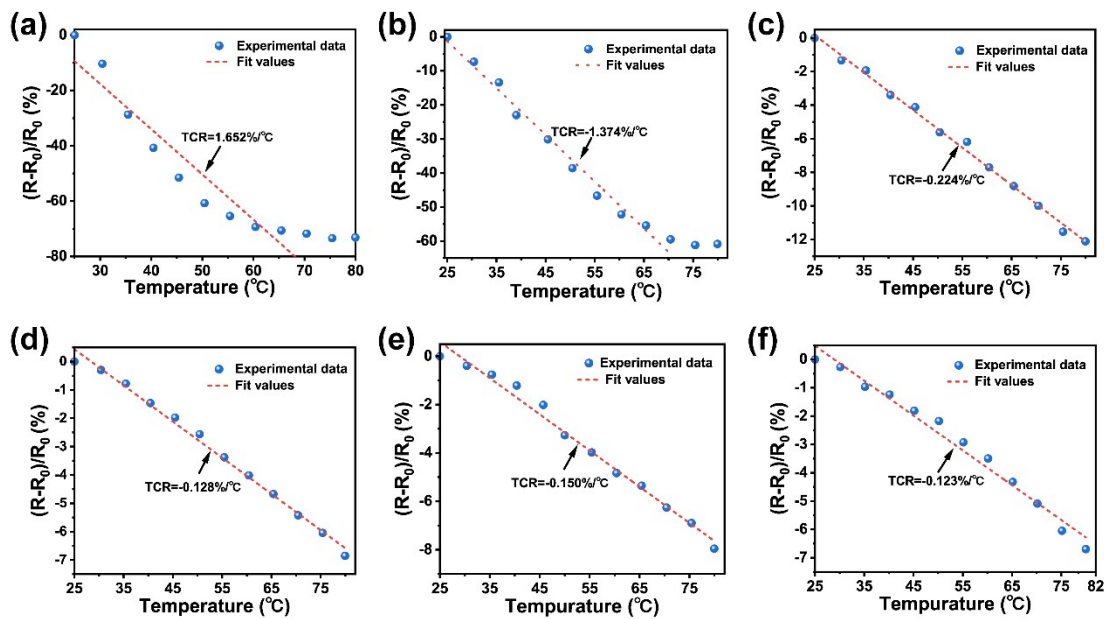

**Figure S12.** Normalized relative resistance changes of SF/GL/CNT sensors upon

increasing temperature from 25 to 80 °C. (a) SF/GL/CNT-0.1 films. (b) SF/GL/CNT-1 films. (c) SF/GL/CNT-3 films. (d) SF/GL/CNT-5 films. (e) SF/GL/CNT-7 films. (f) SF/GL/CNT-9 films.

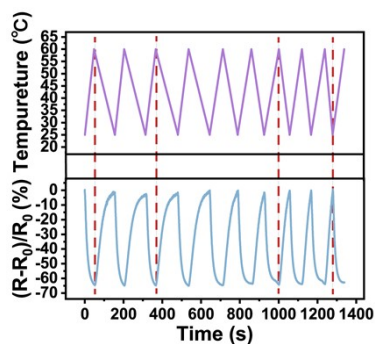

**Figure S13.** Dynamic response of the sensor to hot (60 °C) and cold (25 °C) environment, indicating the negligible signal hysteresis.

**Table S1.** The D, G, and  $I_D/I_G$  of the SF/GL/CNT sensors with varying CNTs content.

| Sample      | D (cm <sup>-1</sup> ) | G (cm <sup>-1</sup> ) | $I_D/I_G$ |
|-------------|-----------------------|-----------------------|-----------|
| SF/GL/CNT-1 | 1306                  | 1597                  | 1.82      |
| SF/GL/CNT-3 | 1310                  | 1605                  | 2.07      |
| SF/GL/CNT-5 | 1311                  | 1606                  | 2.18      |
| SF/GL/CNT-7 | 1314                  | 1608                  | 2.31      |
| SF/GL/CNT-9 | 1315                  | 1610                  | 2.37      |

**Table S2.** Characterization of the  $\beta$ -Sheet content and crystallinity of SF/GL films and SF/GL/CNT films with FTIR spectra and XRD.

| Sample      | $\beta$ -Sheet (%) | $\beta$ -crystallinity (%) |
|-------------|--------------------|----------------------------|
| SF/GL       | 35.3               | 14.06                      |
| SF/GL/CNT-1 | 37.1               | 15.37                      |
| SF/GL/CNT-3 | 39.6               | 17.80                      |
| SF/GL/CNT-5 | 43.4               | 20.66                      |
| SF/GL/CNT-7 | 46.1               | 22.67                      |
| SF/GL/CNT-9 | 33.7               | 13.61                      |

**Table S3.** Summary of thermosensation capacities of temperature sensors

| Sensing materials                  | TCR (%/°C) | Sensing ranges (°C) | Ref.             |
|------------------------------------|------------|---------------------|------------------|
| Pt NFs into silk fibroin membranes | 0.205      | 20-60               | 51               |
| Silk CFM                           | 0.81       | 20-80               | 61               |
| Gr/SF/Ca <sup>2+</sup>             | 2.09       | 20-50               | 16               |
| SS-PEDOT:PSS/rGO                   | 0.99       | 20-50               | 59               |
| Graphene-doped PU                  | 0.815      | 20-100              | 58               |
| PEDOT-TPU                          | 0.95       | 20-40               | 60               |
| BP/LEG on SEBS                     | 0.1736     | 25-50               | 57               |
| GO/polyurethane                    | 0.80       | 30-80               | 56               |
| SF/GL/CNT                          | 1.6        | 25-80               | <b>This work</b> |
